# Supplementary material for: An Effect of Culture Media on Epithelial Differentiation Markers in Breast Cancer Cell Lines MCF7, MDA-MB-436 and SkBr3
Source: MDPI journal article supplement (doi:10.3390/medicina54020011), 2018-03-30
Supplement: s1 [file s1]

Pirsko V, Cakstina I, Priedite M, Dortane R, Feldmane L, Nakazawa-Miklasevica M, Daneberga Z, Gardovskis J, Miklasevics E. “An effect of culture media on epithelial differentiation markers in breast cancer cell lines MCF7, MDA-MB-436 and SkBr3”

**Supplementary Table 2. Outcomes of MCF7, MDA-MB-436 and SkBr3 cell growth in A10, A5, D5 and R5 media during the fourth subculture**

| <b>Cell line</b>  | <b>Medium</b> | <b>Cumulative population doubling level</b> | <b>Generation time, days</b> | <b>Viability, %</b> | <b>Cell yield, times</b> |
|-------------------|---------------|---------------------------------------------|------------------------------|---------------------|--------------------------|
| <b>MCF7</b>       | A10           | 15.86                                       | 2.48                         | 87                  | 5.47                     |
|                   | A5            | 9.80                                        | 4.78                         | 84                  | 2.92                     |
|                   | D5            | 8.36                                        | 11.13                        | 90                  | 2.19                     |
|                   | R5            | 24.87                                       | 3.04                         | 87                  | 48.02                    |
| <b>MDA-MB-436</b> | A10+I+Ct      | 29.26                                       | 2.20                         | 92                  | 213.66                   |
|                   | A5            | 22.61                                       | 4.49                         | 88                  | 75.43                    |
|                   | D5            | 21.74                                       | 7.13                         | 68                  | 15.24                    |
|                   | R5            | 25.82                                       | 4.32                         | 98                  | 122.67                   |
| <b>SkBr3</b>      | A10           | 21.41                                       | 3.67                         | 90                  | 36.13                    |
|                   | A5            | 18.94                                       | 3.84                         | 89                  | 44.35                    |
|                   | D5            | 21.80                                       | 4.61                         | 93                  | 67.31                    |
|                   | R5            | 20.27                                       | 6.63                         | 85                  | 23.04                    |
