# Supplementary material for: An Effect of Culture Media on Epithelial Differentiation Markers in Breast Cancer Cell Lines MCF7, MDA-MB-436 and SkBr3
Source: MDPI journal article supplement (doi:10.3390/medicina54020011), 2018-03-30
Supplement: s1 [file s1]

Pirsko V, Cakstina I, Priedite M, Dortane R, Feldmane L, Nakazawa-Miklasevica M, Daneberga Z, Gardovskis J, Miklasevics E. “An effect of culture media on epithelial differentiation markers in breast cancer cell lines MCF7, MDA-MB-436 and SkBr3”

**Supplementary Table 3. Gene information**

| Category                           | Gene Name | Gene description                                          | Reference number(s)                                                                                                                                                            |
|------------------------------------|-----------|-----------------------------------------------------------|--------------------------------------------------------------------------------------------------------------------------------------------------------------------------------|
| Mature luminal regulator (MLR)     | AR        | androgen receptor                                         | NM_001011645, NM_000044                                                                                                                                                        |
|                                    | ESR1      | estrogen receptor 1                                       | NM_000125, NM_001122740, NM_001122741, NM_001122742, NM_001291230, NM_001291241, NM_001328100, XM_011535543, XM_017010376, XM_017010377, XM_017010378, XM_017010379            |
|                                    | FOXA1     | forkhead box A1                                           | NM_004496                                                                                                                                                                      |
|                                    | GATA3     | GATA binding protein 3                                    | NM_001002295, NM_002051                                                                                                                                                        |
|                                    | HES1      | Hes family bHLH transcription factor 1                    | NM_005524                                                                                                                                                                      |
|                                    | PGR       | Progesterone receptor                                     | NM_000926, NM_001202474, NM_001271161, XM_006718858, XM_011542869                                                                                                              |
|                                    | TBX3      | T-box 3                                                   | NM_005996, NM_016569                                                                                                                                                           |
| Luminal progenitor regulator (LPR) | ELF5      | E74-like factor 5 (ets domain transcription factor)       | NM_001243080, NM_001243081, NM_001422, NM_198381, XM_017017308, XM_017017309                                                                                                   |
|                                    | EZH2      | Enhancer of zeste 2 polycomb repressive complex 2 subunit | NM_001203247, NM_001203248, NM_001203249, NM_004456, NM_152998, XM_017011817, XM_011515883, XM_005249962, XM_011515884, XM_011515885, XM_005249963, XM_011515886, XM_011515887 |
|                                    | FOXM1     | Forkhead box M1                                           | NM_001243088, NM_001243089, NM_021953, NM_202002, NM_202003, XM_011520932, XM_011520933,                                                                                       |

|                          |       |                                                                                    |                                                                                                                                                                                                                                                                       |
|--------------------------|-------|------------------------------------------------------------------------------------|-----------------------------------------------------------------------------------------------------------------------------------------------------------------------------------------------------------------------------------------------------------------------|
|                          |       |                                                                                    | XM_011520935,<br>XM_005253676,<br>XM_011520930,<br>XM_011520931,<br>XM_011520934                                                                                                                                                                                      |
|                          | FOXQ1 | Forkhead box Q1                                                                    | NM_033260                                                                                                                                                                                                                                                             |
|                          | SOX9  | SRY (sex<br>determining<br>region Y)-box 9                                         | NM_000346                                                                                                                                                                                                                                                             |
|                          | VGLL1 | Vestigial-like<br>family member 1                                                  | NM_016267                                                                                                                                                                                                                                                             |
| Basal regulators<br>(BR) | HEY1  | hes-related family<br>bHLH<br>transcription<br>factor with<br>YRPW motif 1         | NM_001040708,<br>NM_001282851, NM_012258                                                                                                                                                                                                                              |
|                          | ID3   | inhibitor of DNA<br>binding 3,<br>dominant negative<br>helix-loop-helix<br>protein | NM_002167                                                                                                                                                                                                                                                             |
|                          | IFI16 | interferon,<br>gamma-inducible<br>protein 16                                       | NM_001206567, NM_005531,<br>XM_006711290,<br>XM_005245127,<br>XM_017001150,<br>XM_017001149                                                                                                                                                                           |
|                          | SNAI2 | Snail family zinc<br>finger 2                                                      | NM_003068                                                                                                                                                                                                                                                             |
|                          | TBX2  | T-box 2                                                                            | NM_005994, XM_011525159                                                                                                                                                                                                                                               |
|                          | TP63  | Tumor protein<br>p63                                                               | NM_001114978,<br>NM_001114979,<br>NM_001114980,<br>NM_001114981,<br>NM_001114982, NM_003722,<br>NM_001329148,<br>NM_001329145,<br>NM_001329146,<br>NM_001329149,<br>NM_001329150,<br>NM_001329144,<br>NM_001329964,<br>XM_017007387,<br>XM_005247844,<br>XM_011513251 |
|                          |       |                                                                                    |                                                                                                                                                                                                                                                                       |
| Luminal marker<br>(LM)   | EPCAM | Epithelial cell<br>adhesion<br>molecule                                            | NM_002354                                                                                                                                                                                                                                                             |
|                          | ESR2  | Estrogen receptor<br>2                                                             | NM_001437, NM_001040275,<br>NM_001214902,<br>NM_001271876,                                                                                                                                                                                                            |

|                      |         |                                                                  |                                                                                                                                                                 |
|----------------------|---------|------------------------------------------------------------------|-----------------------------------------------------------------------------------------------------------------------------------------------------------------|
|                      |         |                                                                  | NM_001271877,<br>NM_001291712,<br>NM_001291723,<br>XM_017021079,<br>XM_017021080,<br>XM_017021081,<br>XM_017021082,<br>XM_017021083,<br>XM_017021084            |
|                      | KRT18   | Keratin 18                                                       | NM_000224, NM_199187                                                                                                                                            |
|                      | KRT19   | Keratin 19                                                       | NM_002276                                                                                                                                                       |
|                      | KRT7    | Keratin 7                                                        | NM_005556, XM_017019294.1                                                                                                                                       |
|                      | KRT8    | Keratin 8                                                        | NM_001256282,<br>NM_001256293, NM_002273                                                                                                                        |
|                      | MUC1    | Mucin 1, cell<br>surface associated                              | NM_001204294,<br>NM_001204293,<br>NM_001204292,<br>NM_001204288,<br>NM_001204287,<br>NM_001204286,<br>NM_001204285,<br>NM_001018017,<br>NM_001018016, NM_002456 |
|                      | NAT1    | N-<br>acetyltransferase<br>1 (arylamine N-<br>acetyltransferase) | NM_001160170,<br>NM_001160171,<br>NM_001160172,<br>NM_001160173,<br>NM_001160175, NM_000662,<br>NM_001160176,<br>XM_011544687,<br>XM_011544688                  |
|                      | TMEM45B | Transmembrane<br>protein 45B                                     | NM_138788, NM_001331210,<br>NM_001331211,<br>NM_001331212,<br>XM_017017188,<br>XM_017017189                                                                     |
|                      | SLC39A6 | Solute carrier<br>family 39 (zinc<br>transporter),<br>member 6   | NM_012319, NM_001099406,<br>XM_011525900,<br>XM_011525901                                                                                                       |
|                      | XBP1    | X-box binding<br>protein 1                                       | NM_001079539, NM_005080                                                                                                                                         |
| Basal marker<br>(BM) | ERBB2   | erb-b2 receptor<br>tyrosine kinase 2                             | NM_001289938,<br>NM_001289936,<br>NM_001005862                                                                                                                  |
|                      | EGFR    | Epidermal growth<br>factor receptor                              | NM_005228                                                                                                                                                       |
|                      | FOXC1   | Forkhead box C1                                                  | NM_001453                                                                                                                                                       |
|                      | ITGB3   | Integrin, beta 3<br>(platelet                                    | NM_000212                                                                                                                                                       |

|  |          |                                       |                           |
|--|----------|---------------------------------------|---------------------------|
|  |          | glycoprotein IIIa,<br>antigen CD61)   |                           |
|  | KRT16    | Keratin 16                            | NM_005557, XM_170845      |
|  | KRT17    | Keratin 17                            | NM_000422                 |
|  | KRT6A    | Keratin 6A                            | NM_005554                 |
|  | KRTAP5-6 | keratin associated<br>protein 5-6     | NM_001012416              |
|  | MIA      | Melanoma<br>inhibitory activity       | NM_001202553, NM_006533   |
|  | PROCR    | Protein C<br>receptor,<br>endothelial | NM_006404, XM_011528496.1 |
