# Supplementary material for: An Effect of Culture Media on Epithelial Differentiation Markers in Breast Cancer Cell Lines MCF7, MDA-MB-436 and SkBr3
Source: MDPI journal article supplement (doi:10.3390/medicina54020011), 2018-03-30

Pirsko V, Cakstina I, Priedite M, Dortane R, Feldmane L, Nakazawa-Miklasevica M, Daneberga Z, Gardovskis J, Miklasevics E. “An effect of culture media on epithelial differentiation markers in breast cancer cell lines MCF7, MDA-MB-436 and SkBr3”

**Supplementary Figure 1. Correlation plot of Ct values for the expression of studied genes in reference breast cancer cell lines: (A) MCF7, (B) SkBr3, and (C) MDA-MB-436.** The upper triangle contains Ct values plotted pairwise against each other for comparison of media. The lower triangles show the correlation between samples.

**(A)**

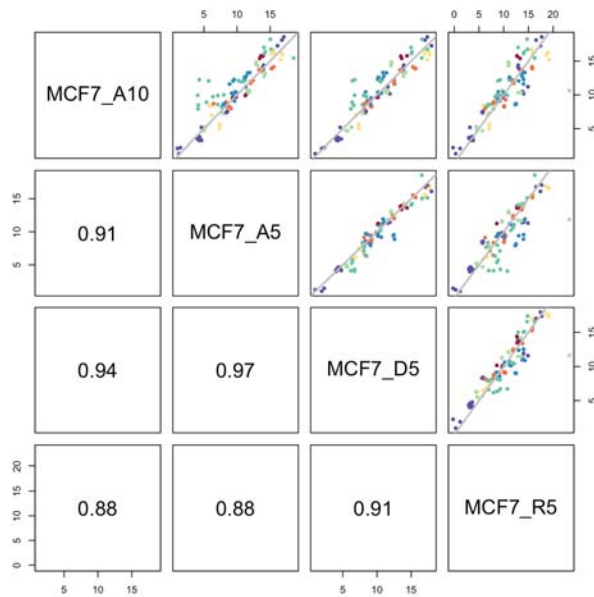

**(B)**

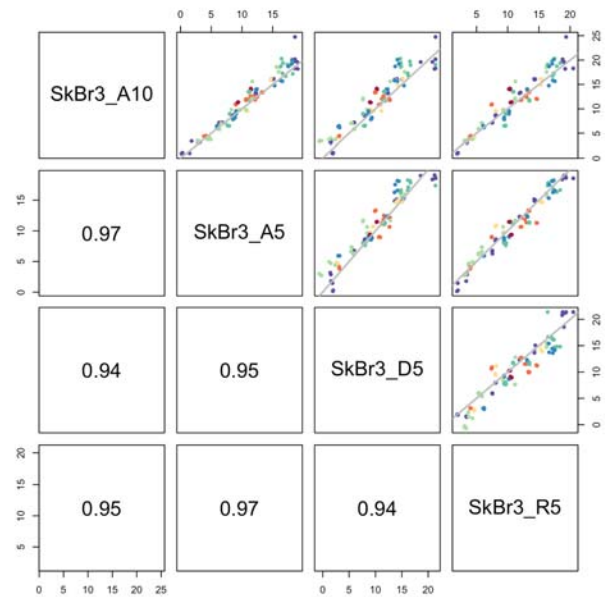

**(C)**

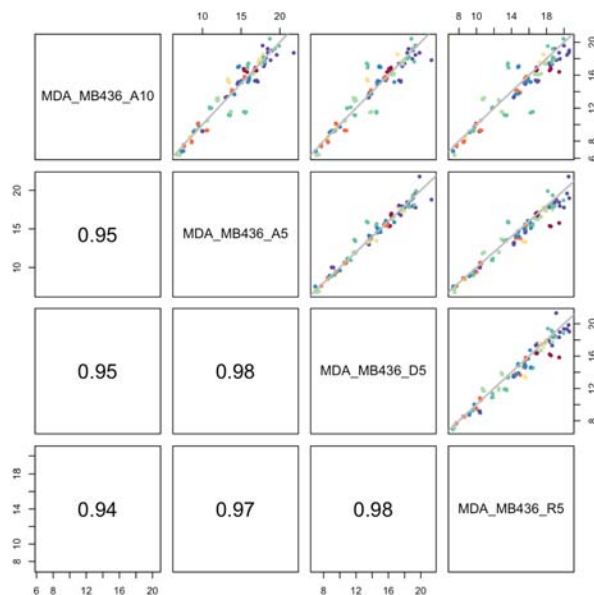

Supplement: s1 [file s1]
